# Supplementary material
Source: ML conference proceedings conference paper supplement (https://openaccess.thecvf.com/content/cvpr_2016/html/Kanehira_Multi-Label_Ranking_From_2016_CVPR_paper.html)
Supplement: Supplementary file 1 [file Kanehira_Multi-Label_Ranking_From_2016_CVPR_supplemental.pdf]

### A.

From two conditions  $P(y_i=1|s_i=0)=P(y_i=1)$  and  $P(\mathbf{x}|s_i=1)=P(\mathbf{x}|y_i=1)$ ,

$$\begin{aligned}
& P(f_i < f_j \mid s_i=1, s_j=0) \\
&= P(f_i < f_j \mid y_i=1, s_j=0) \\
&= P(y_j=0 \mid y_i=1, s_j=0)P(f_i < f_j \mid y_i=1, y_j=0, s_j=0) \\
&+ P(y_j=1 \mid y_i=1, s_j=0)P(f_i < f_j \mid y_i=1, y_j=1, s_j=0) \\
&= P(y_j=0 \mid y_i=1)P(f_i < f_j \mid y_i=1, y_j=0) \\
&+ P(y_j=1 \mid y_i=1)P(f_i < f_j \mid y_i=1, y_j=1). \tag{20}
\end{aligned}$$

Similarly,

$$\begin{aligned}
& \frac{1}{2}P(f_i=f_j \mid s_i=1, s_j=0) \\
&= \frac{1}{2}P(y_j=0 \mid y_i=1)P(f_i=f_j \mid y_i=1, y_j=0) \\
&+ \frac{1}{2}P(y_j=1 \mid y_i=1)P(f_i=f_j \mid y_i=1, y_j=1). \tag{21}
\end{aligned}$$

Combining them, we obtain

$$\begin{aligned}
& R_X(i, j) \\
&= P(f_i < f_j \mid s_i=1, s_j=0) + \frac{1}{2}P(f_i=f_j \mid s_i=1, s_j=0) \\
&= (1-\pi_{ij})R(i, j) + \pi_{ij}R_{-X}(i, j). \tag{22}
\end{aligned}$$

### B.

From (13),

$$\begin{aligned}
& P(y_i=1, y_j=0)R(i, j) \\
&= \frac{P(y_i=1, y_j=0)}{P(y_j=0|y_i=1)} \left\{ R_X(i, j) - P(y_j=1|y_i=1)R_{-X}(i, j) \right\} \\
&= P(y_i=1)R_X(i, j) - P(y_i=1, y_j=1)R_{-X}(i, j), \tag{23}
\end{aligned}$$

Plugging the equation above and (14) into (6), we obtain

$$\begin{aligned}
& \mathcal{L}_{\text{rank}} \\
&= \sum_{1 \leq i < j \leq m} P(y_i=1, y_j=0)R(i, j) + P(y_i=0, y_j=1)R(j, i) \\
&= \sum_{1 \leq i < j \leq m} P(y_i=1)R_X(i, j) + P(y_j=1)R_X(j, i) \\
&\quad - P(y_i=1, y_j=1) \left\{ R_{-X}(i, j) + R_{-X}(j, i) \right\} \\
&= \sum_{1 \leq i < j \leq m} P(y_i=1)R_X(i, j) + P(y_j=1)R_X(j, i) \\
&\quad - P(y_i=1, y_j=1), \tag{24}
\end{aligned}$$

### C.

Because

$$\begin{aligned}
& P(y_i=1) - P(s_i=1, s_j=0) \\
&= P(y_i=1, s_i=0) + P(y_i=1, s_i=1) - P(y_i=1, s_i=1, s_j=0) \\
&= P(y_i=1, s_i=0) + P(s_i=1, s_j=1), \tag{25}
\end{aligned}$$

from (15) and (9), we obtain

$$\begin{aligned}
& \mathcal{L}_{\text{rank}} - \hat{\mathcal{L}}_{\text{rank}} \\
&= \sum_{1 \leq i < j \leq m} P(y_i=1)R_X(i, j) + P(y_j=1)R_X(j, i) - \text{const} \\
&\quad - \sum_{1 \leq i < j \leq m} P(s_i=1, s_j=0)R_X(i, j) + P(s_i=0, s_j=1)R_X(j, i) \\
&= \sum_{1 \leq i < j \leq m} P(s_i=1, s_j=1) \left\{ R_X(i, j) + R_X(j, i) \right\} \\
&\quad + P(y_i=1, s_i=0)R_X(i, j) + P(y_j=1, s_j=0)R_X(j, i) \\
&\quad + \text{const}. \tag{26}
\end{aligned}$$

The first term is proportional to the ratio of samples having both  $i$ -th and  $j$ -th label. Second and third terms are proportional to ratio of samples, which is not labeled even if they are positive.

### D.

When labels are given completely, the loss function which should be minimized is (6),

$$\begin{aligned}
& \mathcal{L}_{\text{rank}} \\
&= \sum_{1 \leq i < j \leq m} P(y_i=1, y_j=0)R(i, j) + P(y_i=0, y_j=1)R(j, i). \tag{27}
\end{aligned}$$

However, the loss function derived based on ‘‘case-controlled’’ assumption is (15)

$$\begin{aligned}
& \mathcal{L}_{\text{rank}} \\
&= \sum P(y_i=1)R_X(i, j) + P(y_j=1)R_X(j, i) - P(y_i=1, y_j=1) \tag{28}
\end{aligned}$$

Considering the case in which label deficit does not exist, because  $R(i, j)=R_X(i, j)$ ,

$$\begin{aligned}
& \mathcal{L}_{\text{rank-false}} \\
&= \sum P(y_i=1)R(i, j) + P(y_j=1)R(j, i) - P(y_i=1, y_j=1). \tag{29}
\end{aligned}$$

Their mutual difference is

$$\begin{aligned}
& \mathcal{L}_{\text{rank-false}} - \mathcal{L}_{\text{rank}} \\
&= \sum P(y_i=1, y_j=1) \left\{ R(i, j) + R(j, i) - 1 \right\}. \tag{30}
\end{aligned}$$

This error is proportional to the joint probability that both  $i$ -th class and  $j$ -th class are positive. However, this error is cancelled if we use symmetric surrogate loss.
